# Supplementary material for: Stored white tea ameliorates DSS-induced ulcerative colitis in mice by modulating the composition of the gut microbiota and intestinal metabolites
Source: Royal Society of Chemistry journal article supplement (doi:10.1039/d3fo05176e), 2024-01-01
Supplement: d3fo05176e1.pdf [file d3fo05176e1.pdf]

# Stored white tea ameliorates DSS-induced ulcerative colitis in mice by modulating the composition of the gut microbiota and intestinal metabolites

## Supplementary Methods

### 1. LC-MS analytical conditions

The chromatographic column was an HSS T3 column (100 mm × 2.1 mm, 1.8 μm, Waters, Manchester, UK), and the column temperature was set as 40 °C. The binary mobile phase was applied at a flow rate of 0.4 mL·min<sup>-1</sup>. Phase A was deionized water containing 0.1% formic acid (v/v), and phase B was acetonitrile containing 0.1% formic acid (v/v). The gradient elution program was set as follows: 0–0.5 min, 2% phase B; 0.5–10 min, 2%–15% phase B; 10–18 min, 15%–40% phase B; 18–20 min, 40%–90% phase B; 20–20.9 min, 90% phase B; 20.9–21 min, 90%–2% phase B; and 21–25 min, 2% phase B. The injection volume was 3 μL. The mass spectrometer was operated in positive electrospray ionization (ESI) mode; the ionization voltage was set at 3.5 kV; the capillary temperature was 300 °C; the S-lens RF level was 50; the sheath gas flow rate was 45 L·min<sup>-1</sup>; the temperature and flow rate of the auxiliary gas were set at 350 °C and 10 L·min<sup>-1</sup>, respectively; and the MS scanning range was set as m/z 80–1200.

### 2. Gut microbiota analysis

#### 2.1. Library preparation and sequencing

Sequencing libraries were generated using NEB Next® Ultra™ DNA Library Prep Kit for Illumina (New England Biolabs, Massachusetts, MA, USA) following manufacturer's recommendations and index codes were added. The library quality was assessed on the Qubit® 2.0 Fluorometer (Thermo Fisher, San Jose, CA, USA) and Agilent Bioanalyzer 2100 system (Agilent, Santa Clara, CA, USA). At last, the library was sequenced on an Illumina NovaSeq 600 platform (Illumina, San Diego, CA, USA) and 250bp paired-end reads were generated.

#### 2.2. Paired-end reads assemblies

Paired-end reads from the original DNA fragments were merged using FLASH (version 1.2.7), a very fast and accurate analysis tool, which was designed to merge paired-end reads when at least some of the reads overlap the read generated from the opposite end of the same DNA fragment.

Paired-end reads was assigned to each sample according to the unique barcodes.

### 2.3. OTU cluster and Species annotation

Sequences analysis was performed by UPARSE software package using the UPARSE-OTU and UPARSE-OTUref algorithms. Sequences with  $\geq 97\%$  similarity were assigned to the same OTUs. We pick a representative sequence for each OTU and use the RDP classifier to annotate taxonomic information for each representative sequence. The level of classification is the phylum, class, order, family, genus and species. Structural changes in species composition represented by cumulative bar charts of relative abundance.

### 2.4. $\alpha$ -Diversity and $\beta$ -diversity analysis

UPARSE software in-house Perl scripts were used to analyze alpha (within samples) and beta (among samples) diversity. The  $\alpha$ -diversity analysis was shown by Observed\_species index, PD\_whole\_tree index, Chao1 index and Ace index. The  $\beta$ -diversity analysis was performed by principal coordinate analysis (PCoA) based on unifrac distance, where QIIME software was used to calculate weighted and unweighted unifrac distance.

### 2.5. Bacterial differential analysis

Linear discriminant analysis Effect Size (LEfSe) was used for the quantitative analysis of biomarkers within different groups. Linear discriminant analysis (LDA) was used to assess the significance of the differing species. LDA scores  $>3$  was identified as differential species. LEfSe analyses were performed via the Galaxy online website (<http://huttenhower.sph.harvard.edu/galaxy/>).

## Supplementary Tables

**Table S1.** Identifications of chemical components and its relative content in 2021WP and 2011WP extracts

| Identification                       | Retention time (min) | Theoretical <i>m/z</i> | Detected <i>m/z</i> | Mass error (ppm) | Peak area in 2021WP extracts | Peak area in 2011WP extracts | P-value <sup>b</sup> |
|--------------------------------------|----------------------|------------------------|---------------------|------------------|------------------------------|------------------------------|----------------------|
| <i>Flavanols</i>                     |                      |                        |                     |                  |                              |                              |                      |
| GC <sup>a</sup>                      | 4.7                  | 307.0812               | 307.0810            | 0.76             | 2.00e8±4.51e6                | 1.60e8±1.45e7                | < 0.001              |
| EGC <sup>a</sup>                     | 7.3                  | 307.0812               | 307.0809            | 0.75             | 1.24e9±1.62e7                | 1.25e9±5.68e7                | 0.822                |
| C <sup>a</sup>                       | 7.7                  | 291.0864               | 291.0862            | 0.58             | 1.85e8±4.20e6                | 8.80e7±6.20e6                | < 0.001              |
| EC <sup>a</sup>                      | 9.9                  | 291.0864               | 291.0862            | 0.45             | 1.09e9±1.37e7                | 7.75e8±4.23e7                | < 0.001              |
| EGCG <sup>a</sup>                    | 10.1                 | 459.0923               | 459.0918            | 0.96             | 3.10e9±3.56e7                | 2.84e9±9.40e7                | 0.001                |
| GCG <sup>a</sup>                     | 11.0                 | 459.0923               | 459.0918            | 0.96             | 4.38e8±6.68e6                | 2.47e8±1.28e7                | < 0.001              |
| EGCG-3''-O-Me <sup>a</sup>           | 12.3                 | 473.1079               | 473.1068            | 2.27             | 1.77e6±4.92e4                | 2.56e6±1.59e5                | < 0.001              |
| EGC 3,5-digallate                    | 12.9                 | 611.1023               | 611.1023            | < 0.01           | 2.09e7±8.55e5                | 9.05e6±1.03e6                | < 0.001              |
| ECG <sup>a</sup>                     | 12.9                 | 443.0973               | 443.0968            | 1.02             | 1.49e9±1.35e7                | 1.21e9±5.44e7                | < 0.001              |
| Epiafzelechin 3-gallate <sup>a</sup> | 14.3                 | 427.1022               | 427.1019            | 0.75             | 8.12e7±1.34e6                | 5.12e7±2.95e6                | < 0.001              |
| Quercetin <sup>a</sup>               | 16.5                 | 303.0499               | 303.0498            | 0.54             | 2.89e7±7.71e5                | 2.35e7±1.67e6                | < 0.001              |
| Kaempferol <sup>a</sup>              | 18.1                 | 287.0550               | 287.0549            | 0.45             | 1.22e8±4.51e6                | 3.73e7±2.01e6                | < 0.001              |
| <i>Phenolic acids</i>                |                      |                        |                     |                  |                              |                              |                      |
| Gallic acid <sup>a</sup>             | 2.3                  | 171.0288               | 171.0288            | 0.02             | 3.91e7±1.81e6                | 4.26e7±7.00e6                | 0.264                |
| Theogallin <sup>a</sup>              | 3.0                  | 345.0815               | 345.0811            | 1.19             | 3.70e9±6.99e7                | 4.09e9±1.64e8                | < 0.001              |
| Chlorogenic acid <sup>a</sup>        | 8.0                  | 355.1021               | 355.1020            | 0.31             | 1.04e8±4.30e6                | 8.77e7±3.57e6                | < 0.001              |
| Strictinin <sup>a</sup>              | 8.5                  | 635.0874               | 635.0870            | 0.74             | 4.93e8±1.31e8                | 4.90e8±1.47e8                | 0.973                |
| Ellagic acid <sup>a</sup>            | 13.0                 | 303.0135               | 303.0134            | 0.55             | 1.65e7±9.61e5                | 7.32e6±9.84e5                | < 0.001              |
| <i>Dimeric catechins</i>             |                      |                        |                     |                  |                              |                              |                      |

|                                        |      |          |          |      |                |                |        |
|----------------------------------------|------|----------|----------|------|----------------|----------------|--------|
| Procyanidin B3                         | 7.1  | 579.1491 | 579.1494 | 0.52 | 1.99e7±7.33e5  | 6.29e6±8.60e5  | <0.001 |
| Procyanidin B2 <sup>a</sup>            | 8.7  | 579.1496 | 579.1493 | 0.59 | 3.36e8±5.67e6  | 1.74e8±1.15e6  | <0.001 |
| Procyanidin C1                         | 9.6  | 867.2124 | 867.2124 | 0.06 | 1.31e7±2.26e5  | 1.08e7±2.56e5  | <0.001 |
| Theasinensin A                         | 9.6  | 915.1611 | 915.1609 | 0.23 | 4.49e7±1.48e6  | 1.60e7±1.19e6  | <0.001 |
| EC-(4beta->8)-EGCG                     | 9.9  | 747.1550 | 747.1546 | 0.54 | 2.10e7±8.86e5  | 1.45e7±3.49e5  | <0.001 |
| EC-(4alpha->8)-ECG                     | 10.6 | 731.1607 | 731.1597 | 1.29 | 6.56e6±1.01e5  | 4.36e6±1.70e5  | <0.001 |
| Theasinensin F                         | 11.3 | 899.1661 | 899.1657 | 0.50 | 2.86e7±5.93e5  | 2.38e7±3.83e5  | <0.001 |
| Theaflavin <sup>a</sup>                | 16.2 | 565.1341 | 565.1336 | 0.81 | 3.75e7±2.27e6  | 1.37e7±7.70e5  | <0.001 |
| Theaflavin-3-gallate <sup>a</sup>      | 16.6 | 717.1447 | 717.1441 | 0.77 | 1.06e7±5.78e5  | 3.27e6±1.99e5  | <0.001 |
| Theaflavin 3,3'-digallate <sup>a</sup> | 16.8 | 869.1554 | 869.1552 | 0.30 | 8.33e6±3.99e5  | 1.71e6±4.56e4  | <0.001 |
| Theaflavin-3'-gallate <sup>a</sup>     | 16.8 | 717.1447 | 717.1443 | 0.53 | 7.26e6±3.58e5  | 1.41e6±4.73e4  | <0.001 |
| <i>Amnio acids</i>                     |      |          |          |      |                |                |        |
| Arginine <sup>a</sup>                  | 0.6  | 175.1189 | 175.1190 | 0.25 | 1.50e9±5.31e7  | 9.28e8±2.09e7  | <0.001 |
| Histidine <sup>a</sup>                 | 0.6  | 156.0767 | 156.0768 | 0.47 | 6.27e7±1.64e6  | 2.85e7±2.18e6  | <0.001 |
| Serine <sup>a</sup>                    | 0.6  | 106.0499 | 106.0499 | 0.63 | 2.30e8±5.70e6  | 1.36e8±1.70e7  | <0.001 |
| Aspartic acid <sup>a</sup>             | 0.7  | 134.0449 | 134.0448 | 0.45 | 1.35e8±4.79e6  | 1.71e8±8.08e6  | <0.001 |
| Gamma-Aminobutyric acid <sup>a</sup>   | 0.7  | 104.0706 | 104.0713 | 6.74 | 1.60e8±1.02e6  | 1.39e8±1.95e6  | <0.001 |
| Glutamic acid <sup>a</sup>             | 0.7  | 130.0500 | 130.0499 | 0.62 | 6.52e8±5.60e6  | 4.37e8±4.58e6  | <0.001 |
| Proline <sup>a</sup>                   | 0.7  | 116.0706 | 116.0709 | 2.34 | 2.51e9±8.51e7  | 1.04e9±1.28e9  | 0.037  |
| Threonine <sup>a</sup>                 | 0.7  | 120.0655 | 120.0657 | 1.47 | 7.79e8±1.62e7  | 6.48e8±1.31e7  | <0.001 |
| Valine <sup>a</sup>                    | 0.7  | 118.0865 | 118.0866 | 0.76 | 3.73e9±3.13e8  | 3.08e9±5.13e7  | 0.001  |
| Theanine <sup>a</sup>                  | 1.0  | 175.1078 | 175.1078 | 0.23 | 2.56e10±1.28e8 | 1.79e10±3.06e8 | <0.001 |
| Pyroglutamic acid <sup>a</sup>         | 1.3  | 130.0500 | 130.0500 | 0.23 | 5.86e8±1.13e7  | 2.11e9±9.20e7  | <0.001 |
| Leucine <sup>a</sup>                   | 1.5  | 132.1019 | 132.1021 | 1.30 | 3.36e9±7.64e7  | 2.24e9±5.95e7  | <0.001 |
| Phenylalanine <sup>a</sup>             | 3.2  | 166.0862 | 166.0863 | 0.07 | 6.44e9±1.78e8  | 4.05e9±2.14e8  | <0.001 |
| Tryptophan <sup>a</sup>                | 5.5  | 205.0973 | 205.0972 | 0.78 | 4.64e9±3.27e7  | 2.63e9±1.72e8  | <0.001 |

|                                         |      |          |          |      |                |                |         |
|-----------------------------------------|------|----------|----------|------|----------------|----------------|---------|
| <i>Alkaloids</i>                        |      |          |          |      |                |                |         |
| Theobromine <sup>a</sup>                | 4.8  | 181.0721 | 181.0721 | 0.17 | 5.90e8±1.44e7  | 6.86e8±3.66e7  | < 0.001 |
| Caffeine <sup>a</sup>                   | 8.2  | 195.0878 | 195.0877 | 0.46 | 6.06e10±9.98e8 | 5.99e10±1.52e9 | 0.354   |
| <i>EPSFs</i>                            |      |          |          |      |                |                |         |
| 8-C S-EGC-cThea                         | 10.5 | 418.1491 | 418.1493 | 0.41 | 2.23e6±4.96e4  | 6.16e7±1.98e6  | < 0.001 |
| 8-C R-EGC-cThea                         | 11.4 | 418.1491 | 418.1493 | 0.53 | 2.56e6±1.18e5  | 7.23e7±2.16e6  | < 0.001 |
| 8-C S-EC-cThea                          | 12.6 | 402.1541 | 402.1541 | 0.12 | 6.30e6±5.87e5  | 7.39e7±1.86e6  | < 0.001 |
| 8-C S-EGCG-cThea <sup>a</sup>           | 13.0 | 570.1598 | 570.1602 | 0.56 | 5.34e6±2.25e5  | 9.46e7±5.43e6  | < 0.001 |
| 8-C R-EC-cThea                          | 13.2 | 402.1541 | 402.1541 | 0.10 | 7.11e6±1.36e5  | 9.42e7±2.97e6  | < 0.001 |
| 8-C R-EGCG-cThea <sup>a</sup>           | 13.2 | 570.1598 | 570.1601 | 0.49 | 9.92e6±4.68e5  | 2.75e8±1.39e7  | < 0.001 |
| 8-C S-ECG-cThea                         | 14.4 | 554.1650 | 554.1653 | 0.43 | 1.58e6±9.75e4  | 4.09e7±1.97e6  | < 0.001 |
| 8-C R-ECG-cThea                         | 14.6 | 554.1650 | 554.1653 | 0.43 | 3.00e6±9.86e4  | 5.42e7±2.19e6  | < 0.001 |
| <i>Flavonoid glycosides</i>             |      |          |          |      |                |                |         |
| Apigenin 6,8-C-diglucoside <sup>a</sup> | 10.7 | 595.1656 | 595.1653 | 0.44 | 7.44e7±2.22e6  | 7.24e7±4.90e6  | 0.391   |
| Quercetin triglucoside                  | 11.5 | 789.2078 | 789.2076 | 0.22 | 3.19e7±5.06e6  | 2.62e7±4.38e6  | 0.062   |
| Myricetin 3-O-galactoside <sup>a</sup>  | 11.9 | 481.0978 | 481.0974 | 0.81 | 1.80e8±1.21e7  | 1.44e8±8.90e6  | < 0.001 |
| Quercetin diglucoside                   | 11.9 | 627.1551 | 627.1548 | 0.46 | 4.92e7±1.41e6  | 4.51e7±2.47e6  | 0.006   |
| Apigenin 6-C-glucosyl-8-C-arabinoside   | 12.1 | 565.1552 | 565.1547 | 0.85 | 1.52e8±5.82e6  | 1.40e8±3.50e6  | 0.002   |
| Myricetin 3-O-glucoside <sup>a</sup>    | 12.1 | 481.0979 | 481.0974 | 0.89 | 2.34e8±4.17e6  | 2.05e8±7.96e6  | < 0.001 |
| Quercetin 3-glucosylrutinoside          | 12.7 | 773.2127 | 773.2124 | 0.41 | 7.85e8±4.93e7  | 7.25e8±3.22e7  | 0.033   |
| Vitexin <sup>a</sup>                    | 13.0 | 433.1132 | 433.1126 | 1.36 | 4.78e7±1.05e6  | 4.94e7±1.98e6  | 0.106   |
| Quercetin 3-O-rutinoside                | 13.1 | 611.1602 | 611.1596 | 0.97 | 2.93e8±1.51e7  | 3.17e8±1.62e7  | 0.022   |
| Kaempferol 3-galactosylrutinoside       | 13.1 | 757.2179 | 757.2174 | 0.66 | 2.91e8±1.07e7  | 2.09e8±1.15e7  | < 0.001 |
| Kaempferitrin <sup>a</sup>              | 13.2 | 579.1715 | 579.1702 | 2.26 | 6.75e7±6.10e5  | 9.10e7±2.69e6  | < 0.001 |
| Quercetin 3-O-galactoside <sup>a</sup>  | 13.2 | 465.1028 | 465.1024 | 0.75 | 2.79e8±1.31e7  | 2.22e8±1.08e7  | < 0.001 |
| Isovitexin <sup>a</sup>                 | 13.2 | 433.1131 | 433.1126 | 1.34 | 3.54e7±5.64e6  | 4.14e7±1.61e6  | 0.047   |

|                                                     |      |          |          |      |               |               |        |
|-----------------------------------------------------|------|----------|----------|------|---------------|---------------|--------|
| Quercetin 3-O-glucoside <sup>a</sup>                | 13.4 | 465.1028 | 465.1024 | 0.75 | 2.68e8±5.32e7 | 2.45e8±8.76e6 | 0.316  |
| Kaempferol 7-(6''-galloylglucoside)                 | 13.4 | 601.1186 | 601.1182 | 0.70 | 1.53e7±5.32e5 | 1.21e7±4.66e5 | <0.001 |
| Kaempferol 3-glucosylrutinoside                     | 13.6 | 757.2179 | 757.2175 | 0.52 | 1.18e9±4.02e7 | 9.23e8±3.03e7 | <0.001 |
| Apigenin 6-C-arabinoside-8-C-glucoside <sup>a</sup> | 13.7 | 565.1546 | 565.1552 | 1.12 | 5.25e5±1.65e4 | 6.62e5±2.82e4 | <0.001 |
| Kaempferol 3-O-galactoside <sup>a</sup>             | 13.9 | 449.1080 | 449.1074 | 1.22 | 2.14e8±5.78e6 | 1.29e8±3.43e6 | <0.001 |
| Kaempferol-3-rutinoside <sup>a</sup>                | 14.0 | 595.1656 | 595.1652 | 0.62 | 2.79e8±8.87e6 | 2.01e8±9.69e6 | <0.001 |
| Kaempferol 3-(6''-galloylglucoside)                 | 14.0 | 601.1188 | 601.1182 | 0.97 | 9.63e6±1.22e6 | 8.26e6±1.44e6 | 0.104  |
| Kaempferol 3-O-glucoside <sup>a</sup>               | 14.2 | 449.1079 | 449.1074 | 1.05 | 3.47e8±7.40e6 | 2.32e8±5.98e6 | <0.001 |
| Kaempferol 3-(6-acetylgalactoside)                  | 15.5 | 491.1186 | 491.1180 | 1.24 | 7.68e5±9.11e4 | 1.08e6±2.73e5 | 0.037  |
| Quercetin 3-(3-p-coumaroylglucoside)                | 16.1 | 611.1395 | 611.1384 | 1.78 | 4.70e6±2.49e5 | 6.94e6±7.88e5 | <0.001 |
| 2''-O-trans-p-Coumaroylstragalol                    | 17.3 | 595.1444 | 595.1441 | 0.57 | 1.58e6±5.47e4 | 1.90e6±7.38e4 | <0.001 |
| Kaempferol 3-dicoumarylglucoside                    | 19.5 | 741.1810 | 741.1809 | 0.22 | 1.13e6±1.52e5 | 1.00e6±4.51e4 | 0.1    |
| <i>Others</i>                                       |      |          |          |      |               |               |        |
| Sucrose                                             | 0.8  | 343.1232 | 343.1231 | 0.44 | 5.92e8±2.54e8 | 4.67e8±2.31e8 | 0.392  |
| Theanine glucoside <sup>a</sup>                     | 1.2  | 337.1605 | 337.1603 | 0.71 | 2.00e9±6.85e7 | 2.73e9±3.82e8 | 0.005  |
| Pyrogallol <sup>a</sup>                             | 2.0  | 127.0390 | 127.0392 | 1.94 | 2.71e7±5.06e5 | 1.54e7±2.20e6 | <0.001 |
| 1-Ethyl-5-hydroxy-2-pyrrolidinone <sup>a</sup>      | 2.6  | 130.0862 | 130.0865 | 1.72 | 3.80e9±2.67e7 | 2.48e9±8.92e7 | <0.001 |
| Cinchonain Ia                                       | 14.5 | 453.1180 | 453.1177 | 0.73 | 2.93e6±9.21e4 | 1.04e6±4.06e4 | <0.001 |

<sup>a</sup> Confirmed with authentic standards.

<sup>b</sup> P-values were determined by independent sample t-test.

**Table S2.** Identifications of intestinal metabolites in mice and its relative content in the CK, DSS, DSS+5-ASA, DSS+2021WP, and DSS+2011WP groups.

| Identification                 | Retention time (min) | Theoretical m/z | Detected m/z | Mass error (ppm) | VIP-Value | P-Value <sup>b</sup> | Peak Area     |               |               |               |               |
|--------------------------------|----------------------|-----------------|--------------|------------------|-----------|----------------------|---------------|---------------|---------------|---------------|---------------|
|                                |                      |                 |              |                  |           |                      | CK            | DSS           | DSS+5-ASA     | DSS+2021WP    | DSS+2011WP    |
| <i>Short chain fatty acids</i> |                      |                 |              |                  |           |                      |               |               |               |               |               |
| Propionic acid <sup>a</sup>    | 0.7                  | 73.0295         | 73.0284      | 15.47            | 1.2       | 0.059                | 1.16e8±3.76e7 | 4.51e7±2.32e7 | 8.91e7±3.36e7 | 7.50e7±1.05e7 | 8.15e7±3.78e7 |
| Butyric acid <sup>a</sup>      | 0.7                  | 87.0452         | 87.0440      | 13.32            | 1.3       | 0.001                | 1.00e8±2.66e7 | 1.00e7±5.80e6 | 3.90e7±1.68e7 | 3.37e7±1.18e7 | 3.25e7±2.30e7 |
| Isobutyric acid <sup>a</sup>   | 0.9                  | 87.0452         | 87.0439      | 14.47            | 1.3       | 0.002                | 1.25e8±3.34e7 | 1.42e7±8.46e6 | 4.94e7±2.26e7 | 4.35e7±1.83e7 | 4.56e7±3.21e7 |
| Valeric acid <sup>a</sup>      | 1.1                  | 101.0608        | 101.0598     | 10.48            | 0.4       | /                    | 1.22e7±7.22e6 | 3.09e6±2.73e6 | 5.16e6±3.84e6 | 1.13e7±1.85e7 | 3.05e6±2.25e6 |
| Isovaleric acid <sup>a</sup>   | 1.3                  | 101.0608        | 101.0598     | 10.29            | 1.0       | 0.007                | 1.35e7±5.17e6 | 1.88e6±7.89e5 | 6.82e6±4.32e6 | 6.88e6±5.78e6 | 4.39e6±4.01e6 |
| <i>Bile acids</i>              |                      |                 |              |                  |           |                      |               |               |               |               |               |
| Alpha-MCA <sup>a</sup>         | 8.8                  | 407.2803        | 407.2804     | 0.21             | 1.3       | 0.016                | 1.57e8±5.63e7 | 4.25e7±2.87e7 | 3.41e7±2.14e7 | 3.62e7±2.13e7 | 4.81e7±2.45e7 |
| Beta-MCA <sup>a</sup>          | 8.8                  | 407.2803        | 407.2804     | 0.21             | 1.2       | /                    | 4.24e7±2.18e7 | 6.70e7±6.34e7 | 2.55e7±1.53e7 | 3.55e7±1.61e7 | 3.78e7±2.03e7 |
| T-beta-MCA <sup>a</sup>        | 9.5                  | 514.2844        | 514.2848     | 0.67             | 0.5       | /                    | 5.03e6±3.66e6 | 8.60e6±7.83e6 | 4.18e6±1.28e6 | 1.09e7±9.00e6 | 5.94e6±2.03e6 |
| T-alpha-MCA <sup>a</sup>       | 9.6                  | 514.2844        | 514.2848     | 0.71             | 0.4       | /                    | 4.56e6±2.96e6 | 1.75e6±1.36e6 | 6.72e5±8.41e4 | 5.09e6±6.99e6 | 2.25e6±1.15e6 |
| UDCA <sup>a</sup>              | 10.6                 | 391.2854        | 391.2860     | 1.43             | 1.2       | 0.001                | 1.25e7±6.41e6 | 7.06e5±4.81e5 | 1.66e6±1.11e6 | 2.27e6±8.85e5 | 3.27e6±1.19e6 |
| CA <sup>a</sup>                | 11.4                 | 407.2803        | 407.2804     | 0.21             | 0.6       | /                    | 6.12e6±5.43e6 | 1.83e6±1.37e6 | 4.76e6±5.10e6 | 2.98e6±2.03e6 | 2.14e6±1.15e6 |
| TCA <sup>a</sup>               | 11.9                 | 514.2844        | 514.2848     | 0.67             | 0.9       | /                    | 3.69e6±2.60e6 | 7.40e5±3.91e5 | 2.55e6±2.10e6 | 1.96e6±1.05e6 | 1.58e6±3.98e5 |
| CDCA <sup>a</sup>              | 12.4                 | 391.2854        | 391.2859     | 1.38             | 1.0       | 0.015                | 1.53e6±1.09e6 | 1.14e5±7.90e4 | 2.65e5±1.26e5 | 3.41e5±4.87e5 | 3.79e5±2.62e5 |
| DCA <sup>a</sup>               | 12.5                 | 391.2854        | 391.2859     | 1.38             | 1.2       | 0.003                | 1.63e8±1.04e8 | 3.92e6±4.12e6 | 1.30e7±6.52e6 | 1.21e7±8.57e6 | 1.35e7±5.17e6 |
| TCDCa <sup>a</sup>             | 12.5                 | 498.2895        | 498.2904     | 1.83             | 0.8       | /                    | 8.24e5±5.72e5 | 1.82e5±4.88e4 | 2.85e5±1.01e5 | 3.95e5±3.61e5 | 4.50e5±2.44e5 |
| TDCA <sup>a</sup>              | 12.6                 | 498.2895        | 498.2901     | 1.13             | 1.0       | 0.048                | 2.01e6±1.88e6 | 5.54e4±2.54e4 | 8.33e4±5.11e4 | 8.21e4±5.85e4 | 1.34e5±6.37e4 |
| LCA <sup>a</sup>               | 13.0                 | 375.2905        | 375.2908     | 0.95             | 1.2       | 0.003                | 2.39e7±1.10e7 | 9.37e5±7.86e5 | 2.89e6±2.71e6 | 2.01e6±1.70e6 | 5.61e6±2.58e6 |
| HDCA <sup>a</sup>              | 10.6                 | 391.2854        | /            | /                | /         | /                    | Not Found     |
| GLCA <sup>a</sup>              | 12.9                 | 432.3119        | /            | /                | /         | /                    | Not Found     |

|                            |      |          |          |      |     |       |               |               |               |               |               |
|----------------------------|------|----------|----------|------|-----|-------|---------------|---------------|---------------|---------------|---------------|
| GDCA <sup>a</sup>          | 12.5 | 448.3068 | /        | /    | /   | /     | Not Found     |
| TLCA <sup>a</sup>          | 13.0 | 482.2946 | /        | /    | /   | /     | Not Found     |
| TDCA <sup>a</sup>          | 12.6 | 498.2895 | /        | /    | /   | /     | Not Found     |
| <i>Amino acids</i>         |      |          |          |      |     |       |               |               |               |               |               |
| Glutamic acid <sup>a</sup> | 0.6  | 146.0459 | 146.0447 | 8.13 | 0.9 | /     | 9.53e7±3.39e7 | 4.72e7±9.97e6 | 6.68e7±1.55e7 | 4.63e7±2.41e7 | 4.14e7±2.09e7 |
| Aspartic acid <sup>a</sup> | 0.6  | 132.0302 | 132.0291 | 8.62 | 1.1 | 0.073 | 1.32e7±3.67e6 | 7.84e6±6.76e6 | 6.43e6±1.77e6 | 7.21e6±3.67e6 | 4.93e6±3.80e6 |
| Arginine <sup>a</sup>      | 0.7  | 173.1044 | 173.1036 | 4.48 | 1.0 | 0.095 | 1.36e7±1.02e7 | 1.64e6±1.66e6 | 3.40e6±1.90e6 | 2.49e6±1.60e6 | 3.22e6±1.57e6 |
| Valine <sup>a</sup>        | 0.7  | 116.0717 | 116.0707 | 8.6  | 0.6 | /     | 1.80e9±2.17e8 | 2.39e9±7.15e8 | 2.03e9±2.65e8 | 2.28e9±4.17e8 | 2.51e9±4.00e8 |
| Proline <sup>a</sup>       | 0.7  | 114.0561 | 114.0553 | 6.56 | 0.7 | /     | 1.76e8±9.80e7 | 1.89e8±7.32e7 | 1.59e8±2.58e7 | 1.78e8±5.33e7 | 1.31e8±4.91e7 |
| Tyrosine <sup>a</sup>      | 0.9  | 180.0666 | 180.0657 | 5.13 | 1.2 | 0.097 | 2.69e6±1.10e6 | 5.20e6±5.32e6 | 2.62e6±1.36e6 | 2.88e6±2.78e6 | 9.87e5±4.40e5 |
| Threonine <sup>a</sup>     | 1.0  | 118.051  | 118.0499 | 9.09 | 1.0 | 0.023 | 5.45e6±3.41e6 | 1.09e6±5.75e5 | 2.44e6±5.56e5 | 2.41e6±8.30e5 | 2.74e6±8.11e5 |
| Leucine <sup>a</sup>       | 1.0  | 130.0874 | 130.0864 | 7.68 | 0.2 | /     | 1.21e8±3.94e7 | 1.46e8±8.74e7 | 1.65e8±1.23e8 | 1.69e8±2.47e8 | 6.28e7±3.65e7 |
| <i>Others</i>              |      |          |          |      |     |       |               |               |               |               |               |
| Taurine                    | 0.7  | 124.0074 | 124.0062 | 9.63 | 1.1 | 0.245 | 1.85e8±1.18e8 | 2.00e8±4.25e7 | 1.32e8±7.56e7 | 1.04e8±5.07e7 | 1.45e8±6.65e7 |

<sup>a</sup> Confirmed with authentic standards.

<sup>b</sup> P-values were determined by Kruskal-Wallis test.



Supplementary Figure

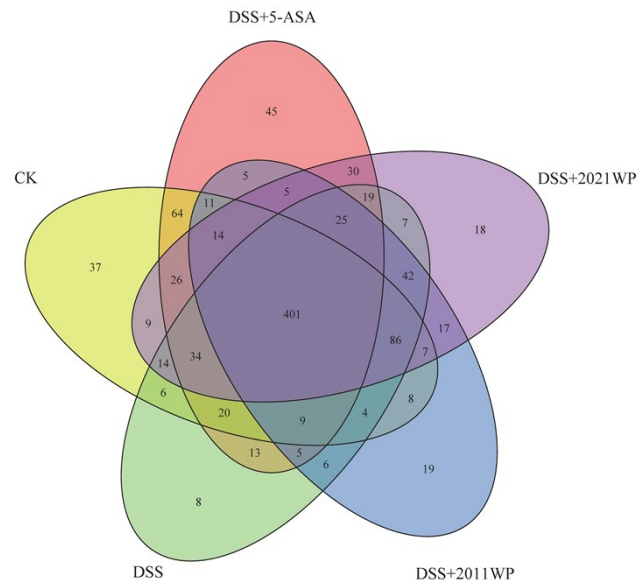

Figure S1. Venn diagram of OTU levels among the CK, DSS, DSS+5-ASA, DSS+2021WP, and DSS+2011WP groups.

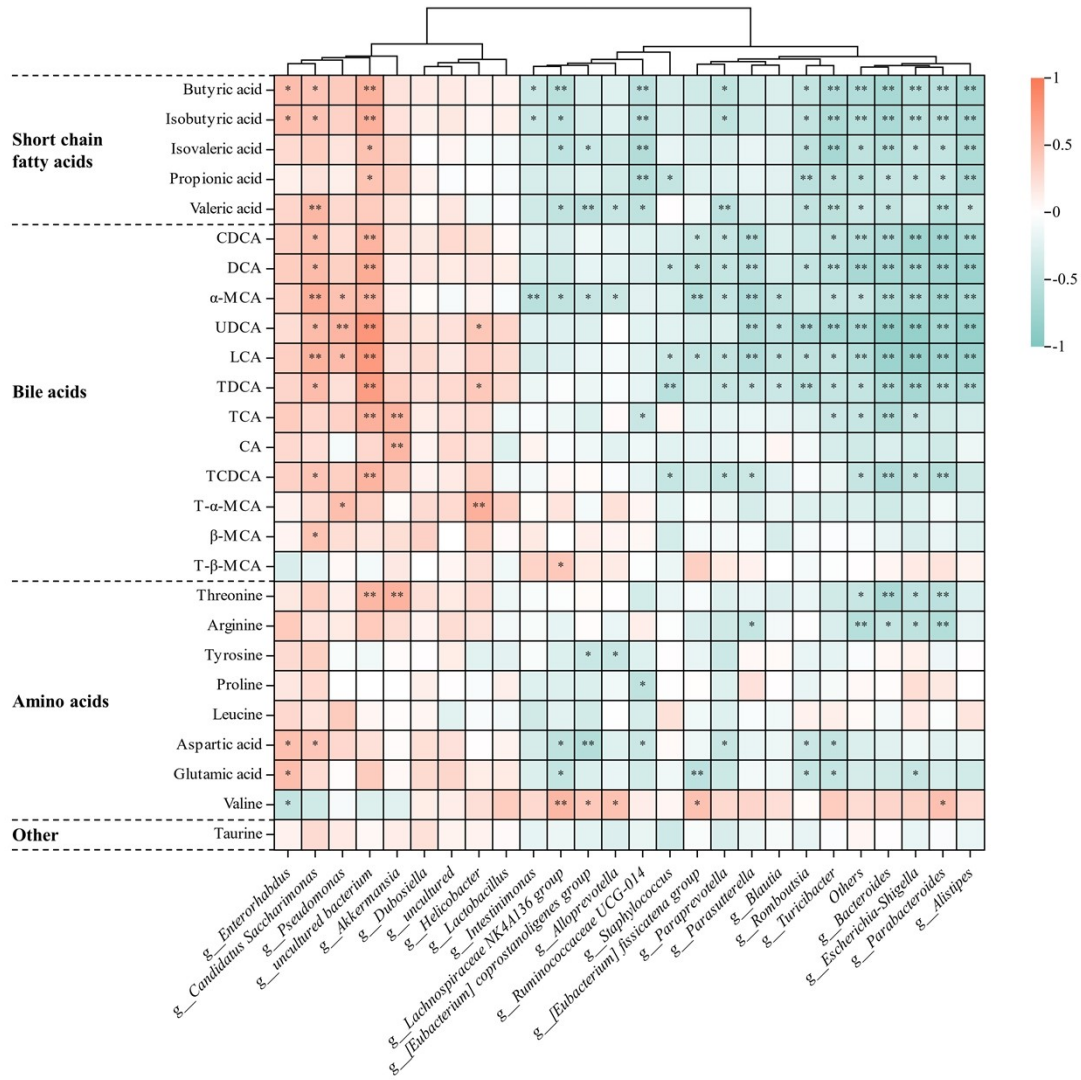

**Figure S2.** The heatmap of Spearman's correlation analysis between 26 intestinal metabolites and gut microbiota. Different colors represent the value of correlation coefficient: red indicates positive correlation and blue indicated negative correlation. \*P < 0.05, \*\*P < 0.01.
